# Supplementary material for: Ethylenediamine-assisted crystallization of Fe2O3microspindles with controllable size and their pseudocapacitance performance
Source: Royal Society of Chemistry journal article supplement (doi:10.1039/c4ce02417f), 2015-01-01
Supplement: c4ce02417f1.pdf [file c4ce02417f1.pdf]

## **Supporting information**

### **Ethylenediamine-assisted crystallization of Fe<sub>2</sub>O<sub>3</sub> microspindles with controllable size and their pseudocapacitance performance**

**Mu Zhang<sup>1</sup>, Kunfeng Chen<sup>2</sup>, Xu Chen<sup>2</sup>, Xiaoyang Peng<sup>1,2</sup>, Xudong Sun<sup>1,\*</sup> and  
DongfengXue<sup>2,\*</sup>**

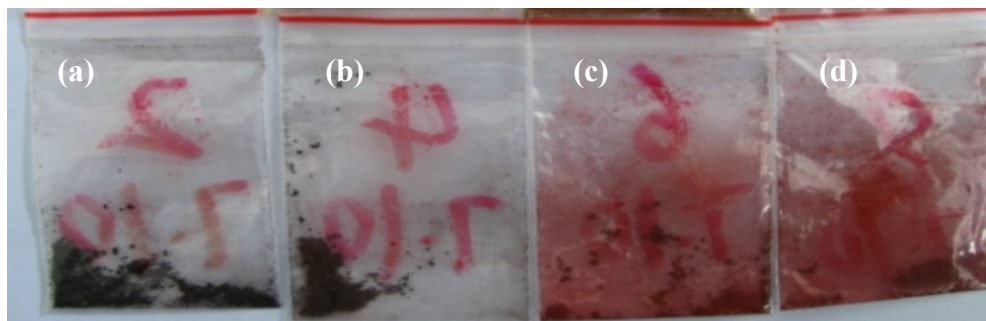

Fig. S1 Different optical color of the as-obtained  $\text{Fe}_2\text{O}_3$  samples by hydrothermal treatment at (a) 80 °C; (b) 100 °C; (c) 120 °C and (d) 140 °C.

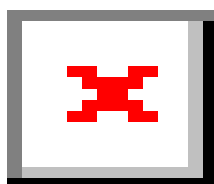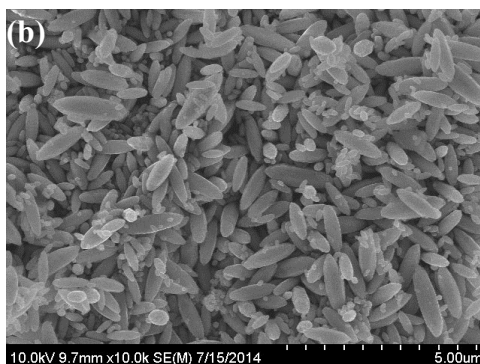

Fig. S2 SEM images of the as-prepared  $\text{Fe}_2\text{O}_3$  products by hydrothermal method using water and EN solution in the volume ratio of 5:5 at different reaction temperatures, 120 °C for (a), and 140 °C for (b).

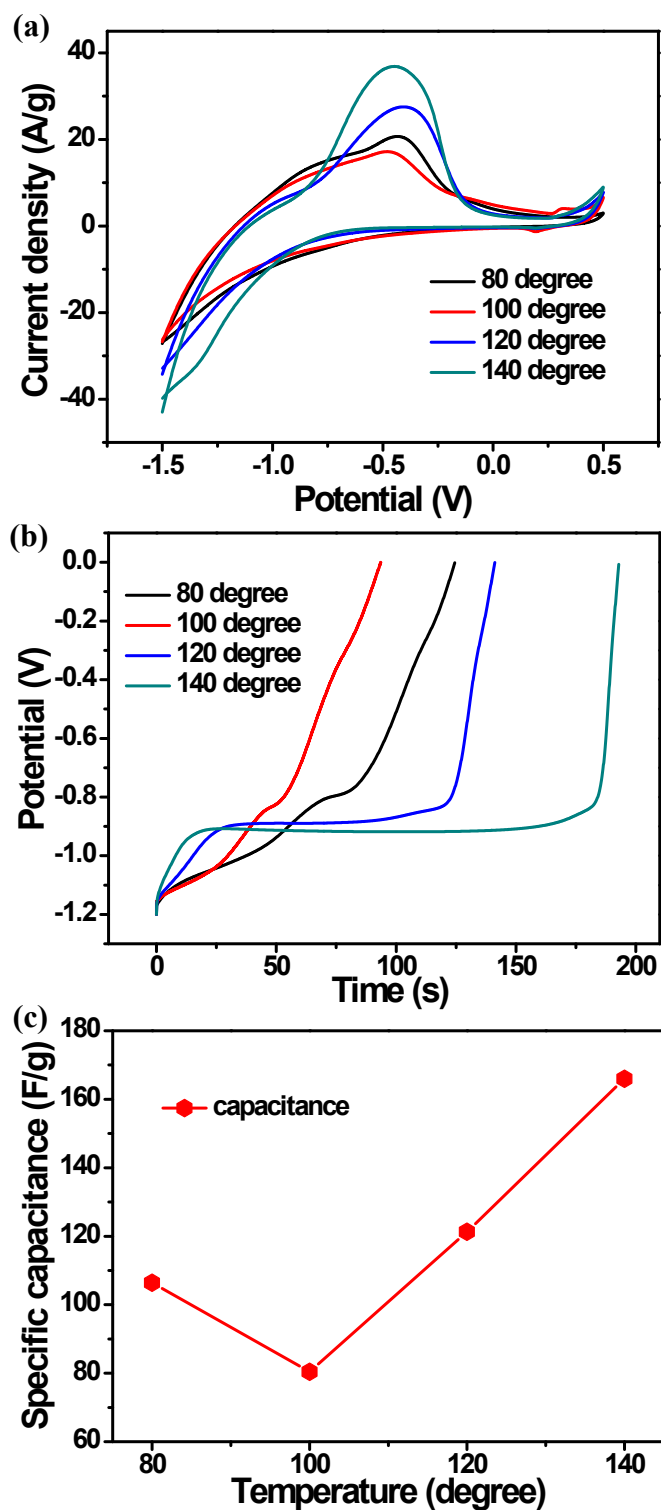

Fig. S3 (a) CV curves of the as-prepared iron components at the scan rate of 100 mV/s within the potential range from  $-1.5$  to  $0.45$  V. (b) Constant current discharge of the iron components at the current density of  $1$  A/g and within the potential range from  $-1.2$  to  $0$  V. (c) The measured specific capacitance of the iron oxides prepared under different reaction temperatures.

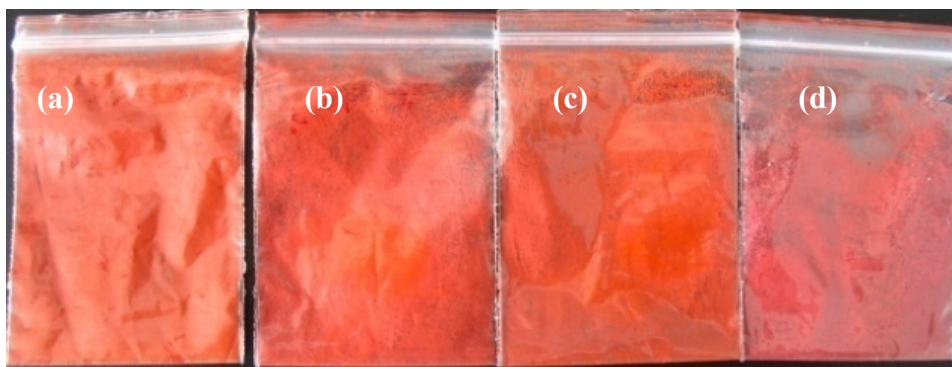

Fig. S4 Different optical color of the as-obtained Fe<sub>2</sub>O<sub>3</sub> samples by hydrothermal treatment at 140 °C with different volume ratios of water to EN: (a) 9:1; (b) 8:2; (c) 7:3 and (d) 6:4.

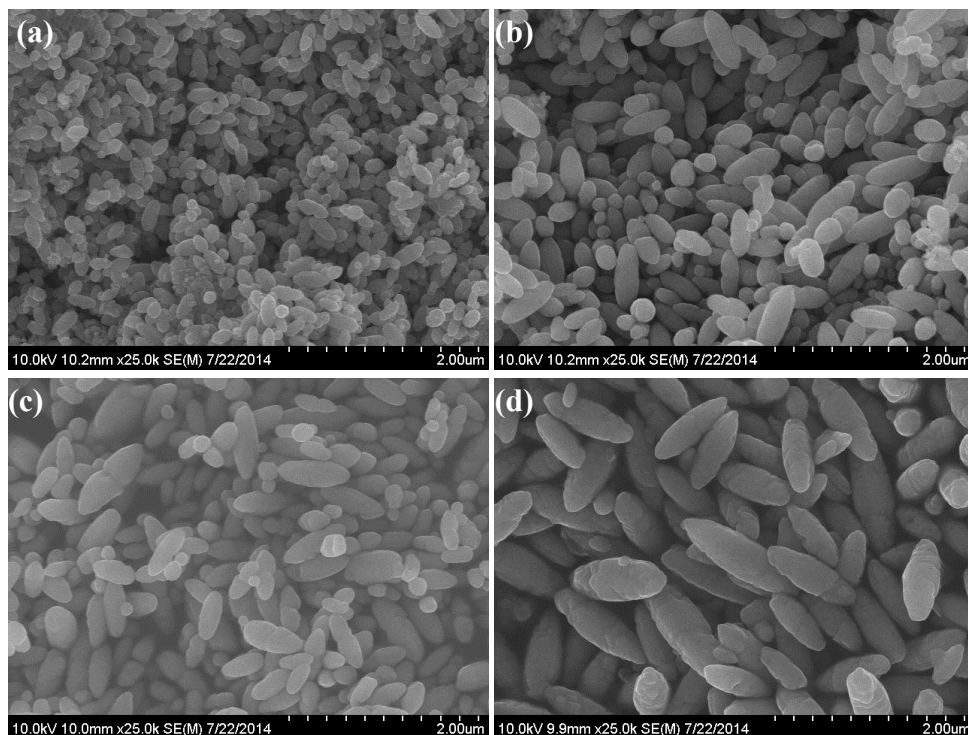

Fig. S5 SEM images of the as-prepared Fe<sub>2</sub>O<sub>3</sub> products by using different volume ratios of water and EN solution, which is 9:1 for (a), 8:2 for (b), 7:3 for (c), and 6:4 for (d).

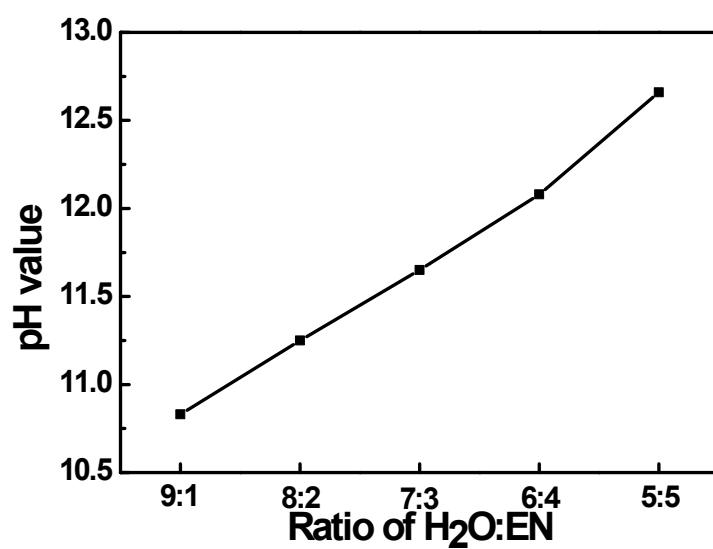

Fig. S6 pH value of the reaction solution with different volume ratios of water to EN.
